# Supplementary material for: A Platform for Designing Genome-Based Personalized Immunotherapy or Vaccine against Cancer
Source: PLoS One. 2016 Nov 10;11(11):e0166372. doi: 10.1371/journal.pone.0166372 (PMC5104390; doi:10.1371/journal.pone.0166372)
Supplement: S1 Table — For all the tissue of origin, most frequent neoepitopes were investigated and predicted for immune induction potential. (XLSX) [file pone.0166372.s002.xlsx]

## Sheet: S1 Table
Tissue type	Protein	Neoepitope	Number of cell lines	Bcell (LBTope)	CTL (CTLPred)	MHC I (ProPred I)	MHC I (NHLApred)	MHC II (ProPred)
AUTONOMIC_GANGLIA	PRKDC	QPTLLYPSG	15	N	N	NA	NA	NA
AUTONOMIC_GANGLIA	PRKDC	RENCRSAPG	15	N	N	HLA-B*0702	NA	NA
AUTONOMIC_GANGLIA	PRKDC	RVGVLQHVH	15	N	N	HLA-A68.1	NA	NA
AUTONOMIC_GANGLIA	PRKDC	SGAIQPAGH	15	N	N	NA	NA	NA
AUTONOMIC_GANGLIA	PRKDC	TLLYPSGAI	15	N	N	HLA-A*0201, HLA-A*0205, HLA-A2.1, HLA-B*5102, HLA-B*5103, HLA-B62, MHC-Db, MHC-Db revised, MHC-Kd, MHC-Kk	NA	NA
AUTONOMIC_GANGLIA	PRKDC	VGVLQHVHW	15	N	N	HLA-B40, HLA-B*51, HLA-B*5301, HLA-B*5801	NA	NA
AUTONOMIC_GANGLIA	PRKDC	VHWRENCRS	15	N	N	HLA-B*3801	NA	DRB1_0402, DRB1_0801, DRB1_0802, DRB1_0804, DRB1_0806, DRB1_0813
AUTONOMIC_GANGLIA	PRKDC	VLQHVHWRE	15	N	N	NA	NA	DRB1_1304
AUTONOMIC_GANGLIA	PRKDC	WRENCRSAP	15	N	N	HLA-B*2702, HLA-B*51, HLA-B*5401	NA	NA
AUTONOMIC_GANGLIA	PRKDC	YPSGAIQPA	15	N	Y	HLA-B*0702, HLA-B*3501, HLA-B*51, HLA-B*5101, HLA-B*5102, HLA-B*5103, HLA-B*5301, HLA-B*5401, MHC-Ld	HLA-Cw*0401, H2-Db, H2-Dd, H2-Kb, H2-Kd, H2-Ld, HLA-G, H-2Qa, Mamu-A*01	NA
BILIARY_TRACT	NR1H2	IRKQQQQQE	8	Y	N	HLA-B*2702	NA	DRB1_1304
BILIARY_TRACT	NR1H2	KIRKQQQQQ	8	Y	N	NA	NA	NA
BILIARY_TRACT	NR1H2	KQQQQQESQ	8	Y	N	NA	NA	NA
BILIARY_TRACT	NR1H2	QQQQQESQS	8	Y	N	NA	NA	NA
BILIARY_TRACT	NR1H2	RKQQQQQES	8	Y	N	HLA-A20 Cattle	NA	NA
BILIARY_TRACT	GPR112	SDMFIQNLA	7	N	N	HLA-B*3701, HLA-B40, HLA-B*4403, HLA-B61	NA	NA
BILIARY_TRACT	GPR112	SISDMFIQN	7	N	N	NA	NA	NA
BILIARY_TRACT	MAP3K1	STTTTTTTE	7	N	N	NA	NA	NA
BILIARY_TRACT	GPR112	VSASISDMF	7	N	N	HLA-B*3501, HLA-B*3701, HLA-B*4403, HLA-B*51, HLA-B*5301, HLA-B*5801, HLA-B62, HLA-Cw*0702, MHC-Ld	NA	NA
BILIARY_TRACT	GPR112	VVSASISDM	7	N	N	HLA-A*0205, HLA-B*3501, HLA-B*51, HLA-B7, MHC-Db revised	NA	DRB1_0301, DRB1_0306, DRB1_0307, DRB1_0308, DRB1_0309, DRB1_0311, DRB1_0404, DRB1_0405, DRB1_0408, DRB1_0410, DRB1_0423, DRB1_0806, DRB1_0813, DRB1_1107, DRB1_1120, DRB1_1301, DRB1_1302, DRB1_1304, DRB1_1327, DRB1_1328
BONE	NR1H2	IRKQQQQQE	21	Y	N	HLA-B*2702	NA	DRB1_1304
BONE	NR1H2	KIRKQQQQQ	21	Y	N	NA	NA	NA
BONE	NR1H2	KQQQQQESQ	21	Y	N	NA	NA	NA
BONE	AKAP12	KVSVAIEED	20	N	N	NA	NA	NA
BONE	NR1H2	QQQQQESQS	21	Y	N	NA	NA	NA
BONE	NR1H2	RKQQQQQES	21	Y	N	HLA-A20 Cattle	NA	NA
BONE	AKAP12	SVAIEEDLE	20	N	N	NA	NA	NA
BONE	AKAP12	VAIEEDLEP	20	N	N	NA	NA	NA
BONE	AKAP12	VKVSVAIEE	20	N	N	NA	NA	DRB1_0701, DRB1_0703
BONE	AKAP12	VSVAIEEDL	20	Y	N	HLA-A24, HLA-B*3501, HLA-B*3701, HLA-B*3902, HLA-B40, HLA-B*51, HLA-B*5801, HLA-B60, HLA-B7, HLA-Cw*0301, HLA-Cw*0602, MHC-Db, MHC-Db revised, MHC-Kd, MHC-Ld	NA	NA
BREAST	PRKDC	QPTLLYPSG	46	N	N	NA	NA	NA
BREAST	PRKDC	RENCRSAPG	46	N	N	HLA-B*0702	NA	NA
BREAST	PRKDC	RVGVLQHVH	46	N	N	HLA-A68.1	NA	NA
BREAST	PRKDC	SGAIQPAGH	46	N	N	NA	NA	NA
BREAST	PRKDC	TLLYPSGAI	46	N	N	HLA-A*0201, HLA-A*0205, HLA-A2.1, HLA-B*5102, HLA-B*5103, HLA-B62, MHC-Db, MHC-Db revised, MHC-Kd, MHC-Kk	NA	NA
BREAST	PRKDC	VGVLQHVHW	46	N	N	HLA-B40, HLA-B*51, HLA-B*5301, HLA-B*5801	NA	NA
BREAST	PRKDC	VHWRENCRS	46	N	N	HLA-B*3801	NA	DRB1_0402, DRB1_0801, DRB1_0802, DRB1_0804, DRB1_0806, DRB1_0813
BREAST	PRKDC	VLQHVHWRE	46	N	N	NA	NA	DRB1_1304
BREAST	PRKDC	WRENCRSAP	46	N	N	HLA-B*2702, HLA-B*51, HLA-B*5401	NA	NA
BREAST	PRKDC	YPSGAIQPA	46	N	Y	HLA-B*0702, HLA-B*3501, HLA-B*51, HLA-B*5101, HLA-B*5102, HLA-B*5103, HLA-B*5301, HLA-B*5401, MHC-Ld	HLA-Cw*0401, H2-Db, H2-Dd, H2-Kb, H2-Kd, H2-Ld, HLA-G, H-2Qa, Mamu-A*01	NA
CENTRAL_NERVOUS_SYSTEM	NR1H2	IRKQQQQQE	43	Y	N	HLA-B*2702	NA	DRB1_1304
CENTRAL_NERVOUS_SYSTEM	NR1H2	KIRKQQQQQ	43	Y	N	NA	NA	NA
CENTRAL_NERVOUS_SYSTEM	NR1H2	KQQQQQESQ	43	Y	N	NA	NA	NA
CENTRAL_NERVOUS_SYSTEM	NR1H2	QQQQQESQS	43	Y	N	NA	NA	NA
CENTRAL_NERVOUS_SYSTEM	NR1H2	RKQQQQQES	43	Y	N	HLA-A20 Cattle	NA	NA
CENTRAL_NERVOUS_SYSTEM	RECQL4	WPLGWGWTG	36	N	N	HLA-B*51, HLA-B*5301, HLA-B*5401	NA	NA
CENTRAL_NERVOUS_SYSTEM	RECQL4	WPRWPLGWG	36	N	N	HLA-B*0702, HLA-B*51, HLA-B*5301, HLA-B*5401	NA	NA
CENTRAL_NERVOUS_SYSTEM	RECQL4	WTGQMCGLC	36	N	N	HLA-B*51, HLA-B*5401, HLA-B*5801	NA	NA
CENTRAL_NERVOUS_SYSTEM	RECQL4	WWPRWPLGW	36	N	N	HLA-B*51, HLA-B*5301, HLA-B*5401	NA	DRB1_0801, DRB1_0802, DRB1_0813, DRB1_0817
CENTRAL_NERVOUS_SYSTEM	RECQL4	WWWPRWPLG	36	N	N	HLA-B*51, HLA-B*5401	NA	NA
ENDOMETRIUM	PRKDC	QPTLLYPSG	27	N	N	NA	NA	NA
ENDOMETRIUM	PRKDC	RENCRSAPG	27	N	N	HLA-B*0702	NA	NA
ENDOMETRIUM	PRKDC	RVGVLQHVH	27	N	N	HLA-A68.1	NA	NA
ENDOMETRIUM	PRKDC	SGAIQPAGH	27	N	N	NA	NA	NA
ENDOMETRIUM	PRKDC	TLLYPSGAI	27	N	N	HLA-A*0201, HLA-A*0205, HLA-A2.1, HLA-B*5102, HLA-B*5103, HLA-B62, MHC-Db, MHC-Db revised, MHC-Kd, MHC-Kk	NA	NA
ENDOMETRIUM	PRKDC	VGVLQHVHW	27	N	N	HLA-B40, HLA-B*51, HLA-B*5301, HLA-B*5801	NA	NA
ENDOMETRIUM	PRKDC	VHWRENCRS	27	N	N	HLA-B*3801	NA	DRB1_0402, DRB1_0801, DRB1_0802, DRB1_0804, DRB1_0806, DRB1_0813
ENDOMETRIUM	PRKDC	VLQHVHWRE	27	N	N	NA	NA	DRB1_1304
ENDOMETRIUM	PRKDC	WRENCRSAP	27	N	N	HLA-B*2702, HLA-B*51, HLA-B*5401	NA	NA
ENDOMETRIUM	PRKDC	YPSGAIQPA	27	N	Y	HLA-B*0702, HLA-B*3501, HLA-B*51, HLA-B*5101, HLA-B*5102, HLA-B*5103, HLA-B*5301, HLA-B*5401, MHC-Ld	HLA-Cw*0401, H2-Db, H2-Dd, H2-Kb, H2-Kd, H2-Ld, HLA-G, H-2Qa, Mamu-A*01	NA
HAEMATOPOIETIC_AND_LYMPHOID_TISSUE	NR1H2	IRKQQQQQE	163	Y	N	HLA-B*2702	NA	DRB1_1304
HAEMATOPOIETIC_AND_LYMPHOID_TISSUE	NR1H2	KIRKQQQQQ	163	Y	N	NA	NA	NA
HAEMATOPOIETIC_AND_LYMPHOID_TISSUE	NR1H2	KQQQQQESQ	163	Y	N	NA	NA	NA
HAEMATOPOIETIC_AND_LYMPHOID_TISSUE	NR1H2	QQQQQESQS	163	Y	N	NA	NA	NA
HAEMATOPOIETIC_AND_LYMPHOID_TISSUE	NR1H2	RKQQQQQES	163	Y	N	HLA-A20 Cattle	NA	NA
HAEMATOPOIETIC_AND_LYMPHOID_TISSUE	PRKDC	VGVLQHVHW	162	N	N	HLA-B40, HLA-B*51, HLA-B*5301, HLA-B*5801	NA	NA
HAEMATOPOIETIC_AND_LYMPHOID_TISSUE	PRKDC	VHWRENCRS	162	N	N	HLA-B*3801	NA	DRB1_0402, DRB1_0801, DRB1_0802, DRB1_0804, DRB1_0806, DRB1_0813
HAEMATOPOIETIC_AND_LYMPHOID_TISSUE	PRKDC	VLQHVHWRE	162	N	N	NA	NA	DRB1_1304
HAEMATOPOIETIC_AND_LYMPHOID_TISSUE	PRKDC	WRENCRSAP	162	N	N	HLA-B*2702, HLA-B*51, HLA-B*5401	NA	NA
HAEMATOPOIETIC_AND_LYMPHOID_TISSUE	PRKDC	YPSGAIQPA	162	N	Y	HLA-B*0702, HLA-B*3501, HLA-B*51, HLA-B*5101, HLA-B*5102, HLA-B*5103, HLA-B*5301, HLA-B*5401, MHC-Ld	HLA-Cw*0401, H2-Db, H2-Dd, H2-Kb, H2-Kd, H2-Ld, HLA-G, H-2Qa, Mamu-A*01	NA
KIDNEY	NR1H2	IRKQQQQQE	22	Y	N	HLA-B*2702	NA	DRB1_1304
KIDNEY	NR1H2	KIRKQQQQQ	22	Y	N	NA	NA	NA
KIDNEY	NR1H2	KQQQQQESQ	22	Y	N	NA	NA	NA
KIDNEY	NR1H2	QQQQQESQS	22	Y	N	NA	NA	NA
KIDNEY	NR1H2	RKQQQQQES	22	Y	N	HLA-A20 Cattle	NA	NA
KIDNEY	RECQL4	WPLGWGWTG	19	N	N	HLA-B*51, HLA-B*5301, HLA-B*5401	NA	NA
KIDNEY	RECQL4	WPRWPLGWG	19	N	N	HLA-B*0702, HLA-B*51, HLA-B*5301, HLA-B*5401	NA	NA
KIDNEY	RECQL4	WTGQMCGLC	19	N	N	HLA-B*51, HLA-B*5401, HLA-B*5801	NA	NA
KIDNEY	RECQL4	WWPRWPLGW	19	N	N	HLA-B*51, HLA-B*5301, HLA-B*5401	NA	DRB1_0801, DRB1_0802, DRB1_0813, DRB1_0817
KIDNEY	RECQL4	WWWPRWPLG	19	N	N	HLA-B*51, HLA-B*5401	NA	NA
LARGE_INTESTINE	NR1H2	IRKQQQQQE	54	Y	N	HLA-B*2702	NA	DRB1_1304
LARGE_INTESTINE	NR1H2	KIRKQQQQQ	54	Y	N	NA	NA	NA
LARGE_INTESTINE	NR1H2	KQQQQQESQ	54	Y	N	NA	NA	NA
LARGE_INTESTINE	NR1H2	QQQQQESQS	54	Y	N	NA	NA	NA
LARGE_INTESTINE	NR1H2	RKQQQQQES	54	Y	N	HLA-A20 Cattle	NA	NA
LARGE_INTESTINE	PRKDC	VGVLQHVHW	47	N	N	HLA-B40, HLA-B*51, HLA-B*5301, HLA-B*5801	NA	NA
LARGE_INTESTINE	PRKDC	VHWRENCRS	47	N	N	HLA-B*3801	NA	DRB1_0402, DRB1_0801, DRB1_0802, DRB1_0804, DRB1_0806, DRB1_0813
LARGE_INTESTINE	PRKDC	VLQHVHWRE	47	N	N	NA	NA	DRB1_1304
LARGE_INTESTINE	PRKDC	WRENCRSAP	47	N	N	HLA-B*2702, HLA-B*51, HLA-B*5401	NA	NA
LARGE_INTESTINE	PRKDC	YPSGAIQPA	47	N	Y	HLA-B*0702, HLA-B*3501, HLA-B*51, HLA-B*5101, HLA-B*5102, HLA-B*5103, HLA-B*5301, HLA-B*5401, MHC-Ld	HLA-Cw*0401, H2-Db, H2-Dd, H2-Kb, H2-Kd, H2-Ld, HLA-G, H-2Qa, Mamu-A*01	NA
LIVER	PRKDC	QPTLLYPSG	23	N	N	NA	NA	NA
LIVER	PRKDC	RENCRSAPG	23	N	N	HLA-B*0702	NA	NA
LIVER	PRKDC	RVGVLQHVH	23	N	N	HLA-A68.1	NA	NA
LIVER	PRKDC	SGAIQPAGH	23	N	N	NA	NA	NA
LIVER	PRKDC	TLLYPSGAI	23	N	N	HLA-A*0201, HLA-A*0205, HLA-A2.1, HLA-B*5102, HLA-B*5103, HLA-B62, MHC-Db, MHC-Db revised, MHC-Kd, MHC-Kk	NA	NA
LIVER	PRKDC	VGVLQHVHW	23	N	N	HLA-B40, HLA-B*51, HLA-B*5301, HLA-B*5801	NA	NA
LIVER	PRKDC	VHWRENCRS	23	N	N	HLA-B*3801	NA	DRB1_0402, DRB1_0801, DRB1_0802, DRB1_0804, DRB1_0806, DRB1_0813
LIVER	PRKDC	VLQHVHWRE	23	N	N	NA	NA	DRB1_1304
LIVER	PRKDC	WRENCRSAP	23	N	N	HLA-B*2702, HLA-B*51, HLA-B*5401	NA	NA
LIVER	PRKDC	YPSGAIQPA	23	N	Y	HLA-B*0702, HLA-B*3501, HLA-B*51, HLA-B*5101, HLA-B*5102, HLA-B*5103, HLA-B*5301, HLA-B*5401, MHC-Ld	HLA-Cw*0401, H2-Db, H2-Dd, H2-Kb, H2-Kd, H2-Ld, HLA-G, H-2Qa, Mamu-A*01	NA
LUNG	NR1H2	IRKQQQQQE	164	Y	N	HLA-B*2702	NA	DRB1_1304
LUNG	NR1H2	KIRKQQQQQ	164	Y	N	NA	NA	NA
LUNG	NR1H2	KQQQQQESQ	164	Y	N	NA	NA	NA
LUNG	NR1H2	QQQQQESQS	164	Y	N	NA	NA	NA
LUNG	NR1H2	RKQQQQQES	164	Y	N	HLA-A20 Cattle	NA	NA
LUNG	PRKDC	VGVLQHVHW	158	N	N	HLA-B40, HLA-B*51, HLA-B*5301, HLA-B*5801	NA	NA
LUNG	PRKDC	VHWRENCRS	158	N	N	HLA-B*3801	NA	DRB1_0402, DRB1_0801, DRB1_0802, DRB1_0804, DRB1_0806, DRB1_0813
LUNG	PRKDC	VLQHVHWRE	158	N	N	NA	NA	DRB1_1304
LUNG	PRKDC	WRENCRSAP	158	N	N	HLA-B*2702, HLA-B*51, HLA-B*5401	NA	NA
LUNG	PRKDC	YPSGAIQPA	158	N	Y	HLA-B*0702, HLA-B*3501, HLA-B*51, HLA-B*5101, HLA-B*5102, HLA-B*5103, HLA-B*5301, HLA-B*5401, MHC-Ld	HLA-Cw*0401, H2-Db, H2-Dd, H2-Kb, H2-Kd, H2-Ld, HLA-G, H-2Qa, Mamu-A*01	NA
OESOPHAGUS	PRKDC	QPTLLYPSG	25	N	N	NA	NA	NA
OESOPHAGUS	PRKDC	RENCRSAPG	25	N	N	HLA-B*0702	NA	NA
OESOPHAGUS	PRKDC	RVGVLQHVH	25	N	N	HLA-A68.1	NA	NA
OESOPHAGUS	PRKDC	SGAIQPAGH	25	N	N	NA	NA	NA
OESOPHAGUS	PRKDC	TLLYPSGAI	25	N	N	HLA-A*0201, HLA-A*0205, HLA-A2.1, HLA-B*5102, HLA-B*5103, HLA-B62, MHC-Db, MHC-Db revised, MHC-Kd, MHC-Kk	NA	NA
OESOPHAGUS	PRKDC	VGVLQHVHW	25	N	N	HLA-B40, HLA-B*51, HLA-B*5301, HLA-B*5801	NA	NA
OESOPHAGUS	PRKDC	VHWRENCRS	25	N	N	HLA-B*3801	NA	DRB1_0402, DRB1_0801, DRB1_0802, DRB1_0804, DRB1_0806, DRB1_0813
OESOPHAGUS	PRKDC	VLQHVHWRE	25	N	N	NA	NA	DRB1_1304
OESOPHAGUS	PRKDC	WRENCRSAP	25	N	N	HLA-B*2702, HLA-B*51, HLA-B*5401	NA	NA
OESOPHAGUS	PRKDC	YPSGAIQPA	25	N	Y	HLA-B*0702, HLA-B*3501, HLA-B*51, HLA-B*5101, HLA-B*5102, HLA-B*5103, HLA-B*5301, HLA-B*5401, MHC-Ld	HLA-Cw*0401, H2-Db, H2-Dd, H2-Kb, H2-Kd, H2-Ld, HLA-G, H-2Qa, Mamu-A*01	NA
OVARY	NR1H2	IRKQQQQQE	46	Y	N	HLA-B*2702	NA	DRB1_1304
OVARY	NR1H2	KIRKQQQQQ	46	Y	N	NA	NA	NA
OVARY	NR1H2	KQQQQQESQ	46	Y	N	NA	NA	NA
OVARY	NR1H2	QQQQQESQS	46	Y	N	NA	NA	NA
OVARY	NR1H2	RKQQQQQES	46	Y	N	HLA-A20 Cattle	NA	NA
OVARY	PRKDC	VGVLQHVHW	43	N	N	HLA-B40, HLA-B*51, HLA-B*5301, HLA-B*5801	NA	NA
OVARY	PRKDC	VHWRENCRS	43	N	N	HLA-B*3801	NA	DRB1_0402, DRB1_0801, DRB1_0802, DRB1_0804, DRB1_0806, DRB1_0813
OVARY	PRKDC	VLQHVHWRE	43	N	N	NA	NA	DRB1_1304
OVARY	PRKDC	WRENCRSAP	43	N	N	HLA-B*2702, HLA-B*51, HLA-B*5401	NA	NA
OVARY	PRKDC	YPSGAIQPA	43	N	Y	HLA-B*0702, HLA-B*3501, HLA-B*51, HLA-B*5101, HLA-B*5102, HLA-B*5103, HLA-B*5301, HLA-B*5401, MHC-Ld	HLA-Cw*0401, H2-Db, H2-Dd, H2-Kb, H2-Kd, H2-Ld, HLA-G, H-2Qa, Mamu-A*01	NA
PANCREAS	NR1H2	IRKQQQQQE	36	Y	N	HLA-B*2702	NA	DRB1_1304
PANCREAS	NR1H2	KIRKQQQQQ	36	Y	N	NA	NA	NA
PANCREAS	NR1H2	KQQQQQESQ	36	Y	N	NA	NA	NA
PANCREAS	NR1H2	QQQQQESQS	36	Y	N	NA	NA	NA
PANCREAS	NR1H2	RKQQQQQES	36	Y	N	HLA-A20 Cattle	NA	NA
PANCREAS	PRKDC	VGVLQHVHW	32	N	N	HLA-B40, HLA-B*51, HLA-B*5301, HLA-B*5801	NA	NA
PANCREAS	PRKDC	VHWRENCRS	32	N	N	HLA-B*3801	NA	DRB1_0402, DRB1_0801, DRB1_0802, DRB1_0804, DRB1_0806, DRB1_0813
PANCREAS	PRKDC	VLQHVHWRE	32	N	N	NA	NA	DRB1_1304
PANCREAS	PRKDC	WRENCRSAP	32	N	N	HLA-B*2702, HLA-B*51, HLA-B*5401	NA	NA
PANCREAS	PRKDC	YPSGAIQPA	32	N	Y	HLA-B*0702, HLA-B*3501, HLA-B*51, HLA-B*5101, HLA-B*5102, HLA-B*5103, HLA-B*5301, HLA-B*5401, MHC-Ld	HLA-Cw*0401, H2-Db, H2-Dd, H2-Kb, H2-Kd, H2-Ld, HLA-G, H-2Qa, Mamu-A*01	NA
PLEURA	PRKDC	QPTLLYPSG	9	N	N	NA	NA	NA
PLEURA	PRKDC	RENCRSAPG	9	N	N	HLA-B*0702	NA	NA
PLEURA	PRKDC	RVGVLQHVH	9	N	N	HLA-A68.1	NA	NA
PLEURA	PRKDC	SGAIQPAGH	9	N	N	NA	NA	NA
PLEURA	PRKDC	TLLYPSGAI	9	N	N	HLA-A*0201, HLA-A*0205, HLA-A2.1, HLA-B*5102, HLA-B*5103, HLA-B62, MHC-Db, MHC-Db revised, MHC-Kd, MHC-Kk	NA	NA
PLEURA	PRKDC	VGVLQHVHW	9	N	N	HLA-B40, HLA-B*51, HLA-B*5301, HLA-B*5801	NA	NA
PLEURA	PRKDC	VHWRENCRS	9	N	N	HLA-B*3801	NA	DRB1_0402, DRB1_0801, DRB1_0802, DRB1_0804, DRB1_0806, DRB1_0813
PLEURA	PRKDC	VLQHVHWRE	9	N	N	NA	NA	DRB1_1304
PLEURA	PRKDC	WRENCRSAP	9	N	N	HLA-B*2702, HLA-B*51, HLA-B*5401	NA	NA
PLEURA	PRKDC	YPSGAIQPA	9	N	Y	HLA-B*0702, HLA-B*3501, HLA-B*51, HLA-B*5101, HLA-B*5102, HLA-B*5103, HLA-B*5301, HLA-B*5401, MHC-Ld	HLA-Cw*0401, H2-Db, H2-Dd, H2-Kb, H2-Kd, H2-Ld, HLA-G, H-2Qa, Mamu-A*01	NA
PROSTATE	NR1H2	IRKQQQQQE	7	Y	N	HLA-B*2702	NA	DRB1_1304
PROSTATE	NR1H2	KIRKQQQQQ	7	Y	N	NA	NA	NA
PROSTATE	NR1H2	KQQQQQESQ	7	Y	N	NA	NA	NA
PROSTATE	AKAP12	KVSVAIEED	7	N	N	NA	NA	NA
PROSTATE	NR1H2	QQQQQESQS	7	Y	N	NA	NA	NA
PROSTATE	NR1H2	RKQQQQQES	7	Y	N	HLA-A20 Cattle	NA	NA
PROSTATE	AKAP12	SVAIEEDLE	7	N	N	NA	NA	NA
PROSTATE	AKAP12	VAIEEDLEP	7	N	N	NA	NA	NA
PROSTATE	AKAP12	VKVSVAIEE	7	N	N	NA	NA	DRB1_0701, DRB1_0703
PROSTATE	AKAP12	VSVAIEEDL	7	Y	N	HLA-A24, HLA-B*3501, HLA-B*3701, HLA-B*3902, HLA-B40, HLA-B*51, HLA-B*5801, HLA-B60, HLA-B7, HLA-Cw*0301, HLA-Cw*0602, MHC-Db, MHC-Db revised, MHC-Kd, MHC-Ld	NA	NA
SALIVARY_GLAND	RECQL4	TSSCSPRAK	2	N	Y	HLA-A68.1	HLA-A24, HLA-A*2402, HLA-B*0702, HLA-Cw*0401, H2-Db, H2-Dd, H2-Kb, H2-Kd, H2-Ld, HLA-G, H-2Qa, Mamu-A*01	NA
SALIVARY_GLAND	RECQL4	VTGSLPTAT	2	N	N	HLA-B*5801	NA	NA
SALIVARY_GLAND	RECQL4	WAGPGVTGS	2	N	N	HLA-B*5103, HLA-B*5401	NA	NA
SALIVARY_GLAND	RECQL4	WGCPQASRA	2	N	N	HLA-B*51, HLA-B*5301, HLA-B*5401	NA	NA
SALIVARY_GLAND	RECQL4	WGWTGQMCG	2	N	N	HLA-B*51, HLA-B*5301, HLA-B*5401	NA	NA
SALIVARY_GLAND	RECQL4	WPLGWGWTG	2	N	N	HLA-B*51, HLA-B*5301, HLA-B*5401	NA	NA
SALIVARY_GLAND	RECQL4	WPRWPLGWG	2	N	N	HLA-B*0702, HLA-B*51, HLA-B*5301, HLA-B*5401	NA	NA
SALIVARY_GLAND	RECQL4	WTGQMCGLC	2	N	N	HLA-B*51, HLA-B*5401, HLA-B*5801	NA	NA
SALIVARY_GLAND	RECQL4	WWPRWPLGW	2	N	N	HLA-B*51, HLA-B*5301, HLA-B*5401	NA	DRB1_0801, DRB1_0802, DRB1_0813, DRB1_0817
SALIVARY_GLAND	RECQL4	WWWPRWPLG	2	N	N	HLA-B*51, HLA-B*5401	NA	NA
SKIN	PRKDC	QPTLLYPSG	47	N	N	NA	NA	NA
SKIN	PRKDC	RENCRSAPG	47	N	N	HLA-B*0702	NA	NA
SKIN	PRKDC	RVGVLQHVH	47	N	N	HLA-A68.1	NA	NA
SKIN	PRKDC	SGAIQPAGH	47	N	N	NA	NA	NA
SKIN	PRKDC	TLLYPSGAI	47	N	N	HLA-A*0201, HLA-A*0205, HLA-A2.1, HLA-B*5102, HLA-B*5103, HLA-B62, MHC-Db, MHC-Db revised, MHC-Kd, MHC-Kk	NA	NA
SKIN	PRKDC	VGVLQHVHW	47	N	N	HLA-B40, HLA-B*51, HLA-B*5301, HLA-B*5801	NA	NA
SKIN	PRKDC	VHWRENCRS	47	N	N	HLA-B*3801	NA	DRB1_0402, DRB1_0801, DRB1_0802, DRB1_0804, DRB1_0806, DRB1_0813
SKIN	PRKDC	VLQHVHWRE	47	N	N	NA	NA	DRB1_1304
SKIN	PRKDC	WRENCRSAP	47	N	N	HLA-B*2702, HLA-B*51, HLA-B*5401	NA	NA
SKIN	PRKDC	YPSGAIQPA	47	N	Y	HLA-B*0702, HLA-B*3501, HLA-B*51, HLA-B*5101, HLA-B*5102, HLA-B*5103, HLA-B*5301, HLA-B*5401, MHC-Ld	HLA-Cw*0401, H2-Db, H2-Dd, H2-Kb, H2-Kd, H2-Ld, HLA-G, H-2Qa, Mamu-A*01	NA
SOFT_TISSUE	PRKDC	QPTLLYPSG	18	N	N	NA	NA	NA
SOFT_TISSUE	PRKDC	RENCRSAPG	18	N	N	HLA-B*0702	NA	NA
SOFT_TISSUE	PRKDC	RVGVLQHVH	18	N	N	HLA-A68.1	NA	NA
SOFT_TISSUE	PRKDC	SGAIQPAGH	18	N	N	NA	NA	NA
SOFT_TISSUE	PRKDC	TLLYPSGAI	18	N	N	HLA-A*0201, HLA-A*0205, HLA-A2.1, HLA-B*5102, HLA-B*5103, HLA-B62, MHC-Db, MHC-Db revised, MHC-Kd, MHC-Kk	NA	NA
SOFT_TISSUE	PRKDC	VGVLQHVHW	18	N	N	HLA-B40, HLA-B*51, HLA-B*5301, HLA-B*5801	NA	NA
SOFT_TISSUE	PRKDC	VHWRENCRS	18	N	N	HLA-B*3801	NA	DRB1_0402, DRB1_0801, DRB1_0802, DRB1_0804, DRB1_0806, DRB1_0813
SOFT_TISSUE	PRKDC	VLQHVHWRE	18	N	N	NA	NA	DRB1_1304
SOFT_TISSUE	PRKDC	WRENCRSAP	18	N	N	HLA-B*2702, HLA-B*51, HLA-B*5401	NA	NA
SOFT_TISSUE	PRKDC	YPSGAIQPA	18	N	Y	HLA-B*0702, HLA-B*3501, HLA-B*51, HLA-B*5101, HLA-B*5102, HLA-B*5103, HLA-B*5301, HLA-B*5401, MHC-Ld	HLA-Cw*0401, H2-Db, H2-Dd, H2-Kb, H2-Kd, H2-Ld, HLA-G, H-2Qa, Mamu-A*01	NA
STOMACH	PRKDC	QPTLLYPSG	33	N	N	NA	NA	NA
STOMACH	PRKDC	RENCRSAPG	33	N	N	HLA-B*0702	NA	NA
STOMACH	PRKDC	RVGVLQHVH	33	N	N	HLA-A68.1	NA	NA
STOMACH	PRKDC	SGAIQPAGH	33	N	N	NA	NA	NA
STOMACH	PRKDC	TLLYPSGAI	33	N	N	HLA-A*0201, HLA-A*0205, HLA-A2.1, HLA-B*5102, HLA-B*5103, HLA-B62, MHC-Db, MHC-Db revised, MHC-Kd, MHC-Kk	NA	NA
STOMACH	PRKDC	VGVLQHVHW	33	N	N	HLA-B40, HLA-B*51, HLA-B*5301, HLA-B*5801	NA	NA
STOMACH	PRKDC	VHWRENCRS	33	N	N	HLA-B*3801	NA	DRB1_0402, DRB1_0801, DRB1_0802, DRB1_0804, DRB1_0806, DRB1_0813
STOMACH	PRKDC	VLQHVHWRE	33	N	N	NA	NA	DRB1_1304
STOMACH	PRKDC	WRENCRSAP	33	N	N	HLA-B*2702, HLA-B*51, HLA-B*5401	NA	NA
STOMACH	PRKDC	YPSGAIQPA	33	N	Y	HLA-B*0702, HLA-B*3501, HLA-B*51, HLA-B*5101, HLA-B*5102, HLA-B*5103, HLA-B*5301, HLA-B*5401, MHC-Ld	HLA-Cw*0401, H2-Db, H2-Dd, H2-Kb, H2-Kd, H2-Ld, HLA-G, H-2Qa, Mamu-A*01	NA
THYROID	PRKDC	QPTLLYPSG	11	N	N	NA	NA	NA
THYROID	PRKDC	RENCRSAPG	11	N	N	HLA-B*0702	NA	NA
THYROID	PRKDC	RVGVLQHVH	11	N	N	HLA-A68.1	NA	NA
THYROID	PRKDC	SGAIQPAGH	11	N	N	NA	NA	NA
THYROID	PRKDC	TLLYPSGAI	11	N	N	HLA-A*0201, HLA-A*0205, HLA-A2.1, HLA-B*5102, HLA-B*5103, HLA-B62, MHC-Db, MHC-Db revised, MHC-Kd, MHC-Kk	NA	NA
THYROID	PRKDC	VGVLQHVHW	11	N	N	HLA-B40, HLA-B*51, HLA-B*5301, HLA-B*5801	NA	NA
THYROID	PRKDC	VHWRENCRS	11	N	N	HLA-B*3801	NA	DRB1_0402, DRB1_0801, DRB1_0802, DRB1_0804, DRB1_0806, DRB1_0813
THYROID	PRKDC	VLQHVHWRE	11	N	N	NA	NA	DRB1_1304
THYROID	PRKDC	WRENCRSAP	11	N	N	HLA-B*2702, HLA-B*51, HLA-B*5401	NA	NA
THYROID	PRKDC	YPSGAIQPA	11	N	Y	HLA-B*0702, HLA-B*3501, HLA-B*51, HLA-B*5101, HLA-B*5102, HLA-B*5103, HLA-B*5301, HLA-B*5401, MHC-Ld	HLA-Cw*0401, H2-Db, H2-Dd, H2-Kb, H2-Kd, H2-Ld, HLA-G, H-2Qa, Mamu-A*01	NA
UPPER_AERODIGESTIVE_TRACT	NR1H2	IRKQQQQQE	31	Y	N	HLA-B*2702	NA	DRB1_1304
UPPER_AERODIGESTIVE_TRACT	NR1H2	KIRKQQQQQ	31	Y	N	NA	NA	NA
UPPER_AERODIGESTIVE_TRACT	NR1H2	KQQQQQESQ	31	Y	N	NA	NA	NA
UPPER_AERODIGESTIVE_TRACT	NR1H2	QQQQQESQS	31	Y	N	NA	NA	NA
UPPER_AERODIGESTIVE_TRACT	NR1H2	RKQQQQQES	31	Y	N	HLA-A20 Cattle	NA	NA
UPPER_AERODIGESTIVE_TRACT	PRKDC	VGVLQHVHW	30	N	N	HLA-B40, HLA-B*51, HLA-B*5301, HLA-B*5801	NA	NA
UPPER_AERODIGESTIVE_TRACT	PRKDC	VHWRENCRS	30	N	N	HLA-B*3801	NA	DRB1_0402, DRB1_0801, DRB1_0802, DRB1_0804, DRB1_0806, DRB1_0813
UPPER_AERODIGESTIVE_TRACT	PRKDC	VLQHVHWRE	30	N	N	NA	NA	DRB1_1304
UPPER_AERODIGESTIVE_TRACT	PRKDC	WRENCRSAP	30	N	N	HLA-B*2702, HLA-B*51, HLA-B*5401	NA	NA
UPPER_AERODIGESTIVE_TRACT	PRKDC	YPSGAIQPA	30	N	Y	HLA-B*0702, HLA-B*3501, HLA-B*51, HLA-B*5101, HLA-B*5102, HLA-B*5103, HLA-B*5301, HLA-B*5401, MHC-Ld	HLA-Cw*0401, H2-Db, H2-Dd, H2-Kb, H2-Kd, H2-Ld, HLA-G, H-2Qa, Mamu-A*01	NA
URINARY_TRACT	PRKDC	QPTLLYPSG	23	N	N	NA	NA	NA
URINARY_TRACT	PRKDC	RENCRSAPG	23	N	N	HLA-B*0702	NA	NA
URINARY_TRACT	PRKDC	RVGVLQHVH	23	N	N	HLA-A68.1	NA	NA
URINARY_TRACT	PRKDC	SGAIQPAGH	23	N	N	NA	NA	NA
URINARY_TRACT	PRKDC	TLLYPSGAI	23	N	N	HLA-A*0201, HLA-A*0205, HLA-A2.1, HLA-B*5102, HLA-B*5103, HLA-B62, MHC-Db, MHC-Db revised, MHC-Kd, MHC-Kk	NA	NA
URINARY_TRACT	PRKDC	VGVLQHVHW	23	N	N	HLA-B40, HLA-B*51, HLA-B*5301, HLA-B*5801	NA	NA
URINARY_TRACT	PRKDC	VHWRENCRS	23	N	N	HLA-B*3801	NA	DRB1_0402, DRB1_0801, DRB1_0802, DRB1_0804, DRB1_0806, DRB1_0813
URINARY_TRACT	PRKDC	VLQHVHWRE	23	N	N	NA	NA	DRB1_1304
URINARY_TRACT	PRKDC	WRENCRSAP	23	N	N	HLA-B*2702, HLA-B*51, HLA-B*5401	NA	NA
URINARY_TRACT	PRKDC	YPSGAIQPA	23	N	Y	HLA-B*0702, HLA-B*3501, HLA-B*51, HLA-B*5101, HLA-B*5102, HLA-B*5103, HLA-B*5301, HLA-B*5401, MHC-Ld	HLA-Cw*0401, H2-Db, H2-Dd, H2-Kb, H2-Kd, H2-Ld, HLA-G, H-2Qa, Mamu-A*01	NA
